# Supplementary material for: COVID-19 knowledge, attitudes, and practices among health care workers in Latin America
Source: PubMed Central journal article supplement — J Bras Pneumol. 2022 Oct 18;48(5):e20220018. doi: 10.36416/1806-3756/e20220018 (PMC9747180; doi:10.36416/1806-3756/e20220018), 2022-10-18
Supplement: 1806-3756-jbpneu-48-05-e20220018-suppl1-pt.pdf [file 1806-3756-jbpneu-48-05-e20220018-suppl1-pt.pdf]

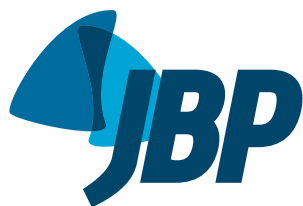

## Conhecimento, atitudes e práticas em relação à COVID-19 entre profissionais de saúde na América Latina

Mayson Laércio de Araújo Sousa<sup>1,2</sup><sup>ORCID</sup>\*, Iara S Shimizu<sup>1,3</sup><sup>ORCID</sup>\*, Cecília M Patino<sup>4</sup><sup>ORCID</sup>, Carlos A. Torres-Duque<sup>5,6</sup><sup>ORCID</sup>, Ignacio Zabert<sup>7</sup><sup>ORCID</sup>, Gustavo E Zabert<sup>7</sup><sup>ORCID</sup>, Rogelio Perez-Padilla<sup>8</sup><sup>ORCID</sup>, Fabio Varón-Vega<sup>5,9,10</sup><sup>ORCID</sup>, Mark Cohen<sup>11</sup><sup>ORCID</sup>, Juliana C Ferreira<sup>1</sup><sup>ORCID</sup>

**Tabela S1.** Características dos respondentes (N = 251) de acordo com a pontuação na seção Atitudes.<sup>a</sup>

| Características                             | Pontuação de atitudes <sup>b</sup> |                                 | p    |
|---------------------------------------------|------------------------------------|---------------------------------|------|
|                                             | Baixa (< 43 pontos)<br>(n = 107)   | Alta (≥ 43 pontos)<br>(n = 124) |      |
| Idade, anos                                 | 48 ± 13                            | 47 ± 13                         | 0,79 |
| Profissão                                   |                                    |                                 |      |
| Médico(a)                                   | 95 (89)                            | 101 (81)                        | 0,17 |
| Fisioterapeuta/terapeuta respiratório(a)    | 9 (8)                              | 17 (14)                         | 0,23 |
| Enfermeiro(a)                               | 3 (3)                              | 1 (1)                           | 0,51 |
| Experiência, anos                           | 20 [12-31]                         | 20 [11-30]                      | 0,71 |
| Tipo de hospital                            |                                    |                                 | 0,16 |
| Público                                     | 55 (51)                            | 67 (55)                         |      |
| Privado                                     | 30 (28)                            | 33 (27)                         |      |
| Universitário                               | 11 (10)                            | 8 (7)                           |      |
| Misto                                       | 7 (7)                              | 12 (10)                         |      |
| Filantrópico                                | 0 (0)                              | 2 (2)                           |      |
| Outros                                      | 4 (4)                              | 0 (0)                           |      |
| Atualmente atua em hospital ou clínica      | 98 (92)                            | 110 (89)                        | 0,52 |
| Atendimento direto a pacientes com COVID-19 | 95 (90)                            | 106 (86)                        | 0,56 |
| Atua em UTI                                 | 27 (25)                            | 35 (28)                         | 0,71 |
| Atua em pronto-socorro                      | 18 (17)                            | 33 (27)                         | 0,10 |
| Residente/ <i>Fellow</i>                    | 8 (8)                              | 4 (3)                           | 0,23 |
| Pesquisador(a)                              | 11 (10)                            | 8 (7)                           | 0,42 |
| Supervisor acadêmico                        | 26 (24)                            | 22 (18)                         | 0,29 |
| Chefe de pessoal                            | 11 (10)                            | 16 (13)                         | 0,68 |
| Diretor(a)                                  | 5 (5)                              | 3 (2)                           | 0,48 |
| Anteriormente testou positivo para COVID-19 | 10 (9)                             | 24 (17)                         | 0,05 |
| Treinamento institucional sobre COVID-19    | 83 (78)                            | 99 (80)                         | 0,80 |

<sup>a</sup>Valores expressos em n (%), média ± dp ou mediana [IIQ]. <sup>b</sup>A pontuação de atitudes foi dicotomizada com base na mediana.

**Tabela S2.** Características das instituições de saúde.<sup>a</sup>

|                                                                               |              |
|-------------------------------------------------------------------------------|--------------|
| Número de leitos hospitalares                                                 | 126 [65-258] |
| Número de leitos de UTI                                                       | 16 [10-34]   |
| Leitos para pacientes com COVID-19                                            | 77 (98)      |
| Número de leitos de UTI para pacientes com COVID-19                           | 40 [12-120]  |
| Número de ventiladores mecânicos de UTI                                       | 15 [9-25]    |
| Número de ventiladores mecânicos extras (fora da UTI)                         | 4 [1-10]     |
| Leitos adicionais para pacientes com COVID-19                                 | 83 (53)      |
| Ventiladores mecânicos adicionais                                             | 50 (63)      |
| Número de ventiladores mecânicos adicionais                                   | 9 [4-20]     |
| Número de CNAF                                                                | 3 [0-10]     |
| Número de equipamentos de CPAP                                                | 5 [1-10]     |
| Número de ventiladores mecânicos não invasivos                                | 5 [1-11]     |
| Número de ventiladores mecânicos invasivos                                    | 20 [13-39]   |
| Número de médicos(as)                                                         | 50 [28-175]  |
| Número de enfermeiros(as)                                                     | 100 [73-565] |
| Número de fisioterapeutas/terapeutas respiratórios(as)                        | 8 [2-20]     |
| Médicos(as) recém contratados(as)                                             | 103 (66)     |
| Enfermeiros(as)/fisioterapeutas recém contratados(as)                         | 103 (66)     |
| Triagem para alocação de ventiladores mecânicos                               | 34 (77)      |
| Ventiladores mecânicos não convencionais                                      | 17 (40)      |
| Ventiladores mecânicos não invasivos não convencionais                        | 16 (39)      |
| Uso de um ventilador para dois pacientes                                      | 2 (5)        |
| Treinamento sobre EPI                                                         | 125 (80)     |
| Falta de EPI                                                                  | 70 (44)      |
| Acesso a testes                                                               | 122 (78)     |
| RT-PCR                                                                        | 102(84)      |
| IgG                                                                           | 61 (50)      |
| IgM                                                                           | 56 (46)      |
| Instituições com médicos(as) infetados(as) por COVID-19                       | 124 (79)     |
| Número de médicos(as) infectados(as) por instituição                          | 6 [3-13]     |
| Número de médicos(as) que necessitaram de ventilação mecânica por instituição | 0 [0-2]      |
| Número de médicos que morreram por instituição                                | 0 [0-0]      |
| Política institucional para retirar profissionais em risco da linha de frente |              |
| Profissionais de saúde                                                        | 155 (73)     |
| Clínico(a) geral                                                              | 107 (94)     |
| Médico(a) especialista                                                        | 103 (97)     |
| Apoio psicológico oferecido aos profissionais de saúde                        | 80 (51)      |
| Serviços de saúde ocupacional disponíveis para os profissionais de saúde      | 110 (71)     |

CNAF: cânulas nasais de alto fluxo; e EPI: equipamentos de proteção individual. <sup>a</sup>Valores expressos em n (%) ou mediana [IIQ].

**Tabela S3.** Disponibilidade de diagnóstico por imagem na instituição.

| Diagnóstico por imagem | Não      | Com restrições | Sem restrições |
|------------------------|----------|----------------|----------------|
| Radiografia de tórax   | 6 (4%)   | 65 (42%)       | 85 (55%)       |
| Ultrassonografia       | 34 (22%) | 62 (40%)       | 60 (39%)       |
| TC                     | 20 (13%) | 58 (37%)       | 78 (50%)       |

**Tabela S4.** Carga de trabalho.

| Profissionais                   | Suficientes, com capacidade ociosa | Suficientes, sem sobrecarga | Suficientes, mas sobrecarregados | Insuficientes para a real situação | Equipe insuficiente e reduzida |
|---------------------------------|------------------------------------|-----------------------------|----------------------------------|------------------------------------|--------------------------------|
| Médicos(as)                     | 13 (9%)                            | 46 (30%)                    | 41 (27%)                         | 39 (26%)                           | 14 (9%)                        |
| Enfermeiros(as)/fisioterapeutas | 12 (8%)                            | 37 (25%)                    | 46 (31%)                         | 37 (25%)                           | 18 (12%)                       |

**Tabela S5.** Disponibilidade e uso de equipamentos de proteção individual de acordo com as recomendações da OMS.

| Equipamentos de proteção individual | Sempre   | Às vezes | Parcialmente | Quase nunca | Não    |
|-------------------------------------|----------|----------|--------------|-------------|--------|
| Disponibilidade                     | 47 (30%) | 62 (40%) | 34 (22%)     | 12 (8%)     | 2 (1%) |
| Uso                                 | 46 (29%) | 68 (43%) | 33 (21%)     | 8 (5%)      | 2 (1%) |

**Tabela S6.** Acesso dos funcionários a equipamentos de proteção individual.

| Tipos                                  | Sempre    | Às vezes | Nunca    | Não sei  |
|----------------------------------------|-----------|----------|----------|----------|
| Respirador N95                         | 100 (64%) | 53 (34%) | 5 (3%)   | 0 (0%)   |
| Máscara cirúrgica                      | 126 (81%) | 28 (18%) | 2 (1%)   | 0 (0%)   |
| Protetor facial ( <i>face shield</i> ) | 100 (64%) | 39 (25%) | 16 (10%) | 2 (1%)   |
| Óculos                                 | 90 (59%)  | 48 (32%) | 12 (8%)  | 3 (2%)   |
| Luvas                                  | 142 (92%) | 13 (8%)  | 0 (0%)   | 0 (0%)   |
| Macacão impermeável                    | 58 (37%)  | 69 (45%) | 26 (17%) | 3 (2%)   |
| Bata impermeável                       | 88 (57%)  | 52 (34%) | 13 (8%)  | 5 (3%)   |
| Câmera acrílica                        | 59 (38%)  | 38 (24%) | 43 (28%) | 17 (11%) |
| Videolaringoscópio                     | 41 (26%)  | 42 (27%) | 59 (38%) | 15 (10%) |
